# Supplementary material for: Getting excited: challenges in quantum-classical studies of excitons in polymeric systems
Source: Royal Society of Chemistry journal article supplement (doi:10.1039/c6cp02944b), 2016-01-01
Supplement: c6cp02944b1.pdf [file c6cp02944b1.pdf]

# **Supporting Information for: Getting excited: Challenges in quantum-classical studies of excitons in polymeric systems**

Behnaz Bagheri, Björn Baumeier, and Mikko Karttunen\*

*Department of Mathematics and Computer Science & Institute for Complex Molecular  
Systems, Eindhoven University of Technology, P.O. Box 513, 5600 MB Eindhoven, The  
Netherlands.*

E-mail: b.baumeier@tue.nl, m.e.j.karttunen@tue.nl

The optimized structures of DPE, Me-DPE and n-PPE ( $n=1,2,\dots,10$ ) in MD and DFT and input files for VOTCA package for calculating excitation energies can be downloaded from our website (<http://www.softsimu.net/>).

---

\*To whom correspondence should be addressed

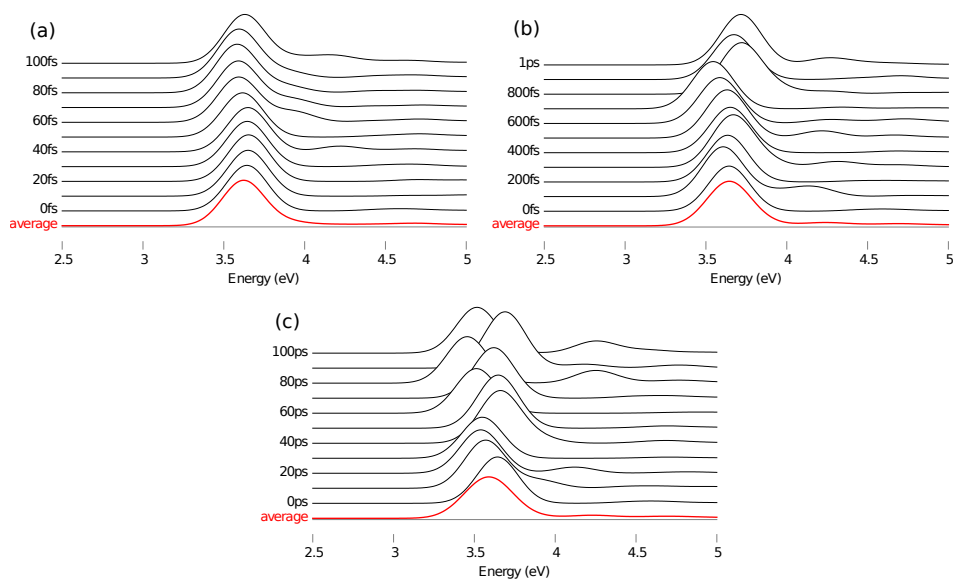

Figure 1: Optical absorption spectra for 10-PPE in toluene for time step 10 fs, 100 fs and 10 ps starting from the same starting configuration. The red curve is the average over eleven snapshots respectively.
